# Supplementary material for: Tracking excess mortality across countries during the COVID-19 pandemic with the World Mortality Dataset
Source: eLife journal article supplement (doi:10.7554/elife.69336), 2021-06-30
Supplement: supp [file elife-69336-supp-v1.zip]

Archive with 3 entries (3 files):
- elife_poa_e69336_Transparent_Reporting_File.pdf
- elife_poa_e69336_source_code_1.tex
- elife_poa_e69336_Figure_3_figure_supplement_1.pdf
