# Supplementary material for: Tracking excess mortality across countries during the COVID-19 pandemic with the World Mortality Dataset
Source: eLife journal article supplement (doi:10.7554/elife.69336), 2021-06-30

# Based on complete 2020 data (March-December)

## Excess deaths (thousands)

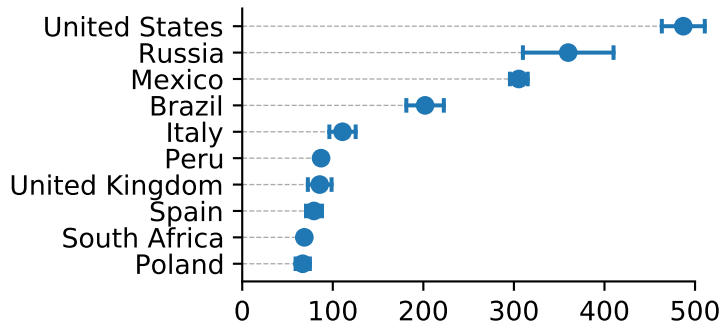

## Excess deaths per 100,000 population

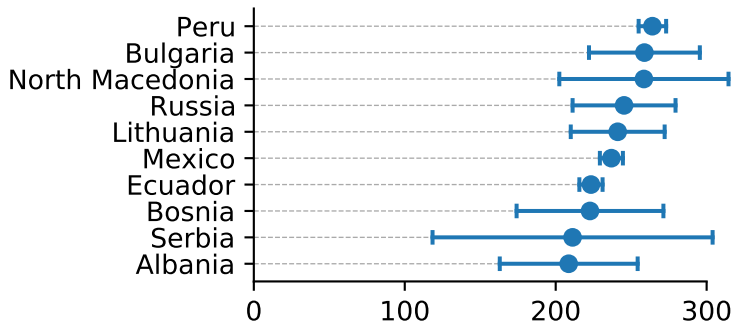

## Excess deaths as % of annual deaths

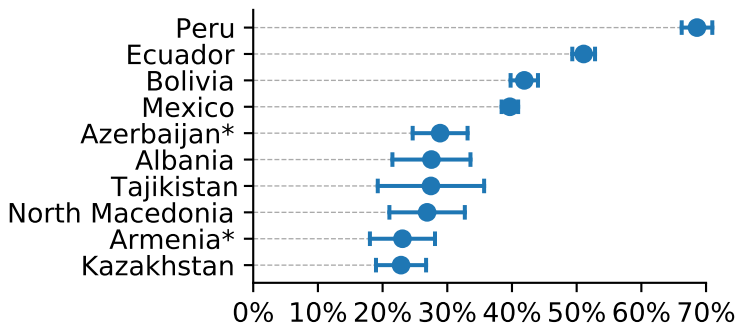

## Undercount ratio: excess / official

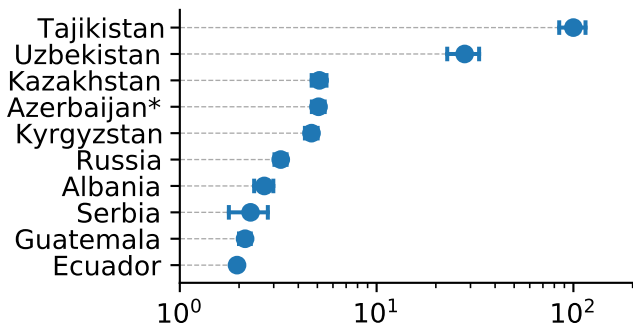

Supplement: supp [file elife-69336-supp-v1.zip › elife_poa_e69336_Figure_3_figure_supplement_1.pdf]
